# Supplementary material for: [Retracted] Betamethasone Dipropionate Derivatization, Biotransformation, Molecular Docking, and ADME Analysis as Glucocorticoid Receptor
Source: Hindawi journal article supplement (doi:10.1155/2022/6865472), 2022-01-01
Supplement: f1 [file 6865472.f1.docx]

**Supplemental Materials**

**Betamethasone Dipropionate Derivatization, Biotransformation, Molecular Docking and ADME Analysis as Glucocorticoid Receptor**

**Sana Rashid1, Shazia Anjum1,2, Aqeel Ahmad3, Raziya Nadeem4, Maqsood Ahmed5, Syed Adnan Ali Shah6, Muhammad Abdullah7, Komal Zia8, Zaheer-Ul-Haq8**

1. Institute of Chemistry, The Islamia University of Bahawalpur, Bahawalpur-63100, Pakistan

2. H.E.J. Research Institute of Chemistry, International Center for Chemical and Biological Sciences, University of Karachi, Karachi-75270, Pakistan

3. University of Chinese Academy of Science (UCAS), Beijing, China

4. Department of Chemistry, University of Agriculture, Faisalabad

5. Material Chemistry Lab, Institute of Chemistry, The Islamia University of Bahawalpur,

Bahawalpur-63100, Pakistan

6. Faculty of Pharmacy, Atta-ur-Rahman Institute for Natural Products Discovery, Universiti Teknologi MARA, Cawangan Selangor Kampus Puncak Alam, 42300 Bandar Puncak Alam,

Selangor D. E., Malaysia

7. Cholistan Institute of Desert Studies, The Islamia University of Bahawalpur, Bahawalpur

63100, Pakistan

8. Dr. Panjwani Center for Molecular Medicine and Drug Research, International Center for

Chemical and Biological Sciences, University of Karachi, Karachi-75270, Pakistan

**Correspondence:**

Dr. Shazia Anjum

Tel.: +92 3002525961; *E-mail address*: [shazia.anjum@iub.edu.pk](mailto:shazia.anjum@iub.edu.pk)

Dr. Aqeel Ahmad

Tel.: +92 21 99261672; *E-mail address*: [aqeel@igsnrr.ac.cn](mailto:aqeel@igsnrr.ac.cn)


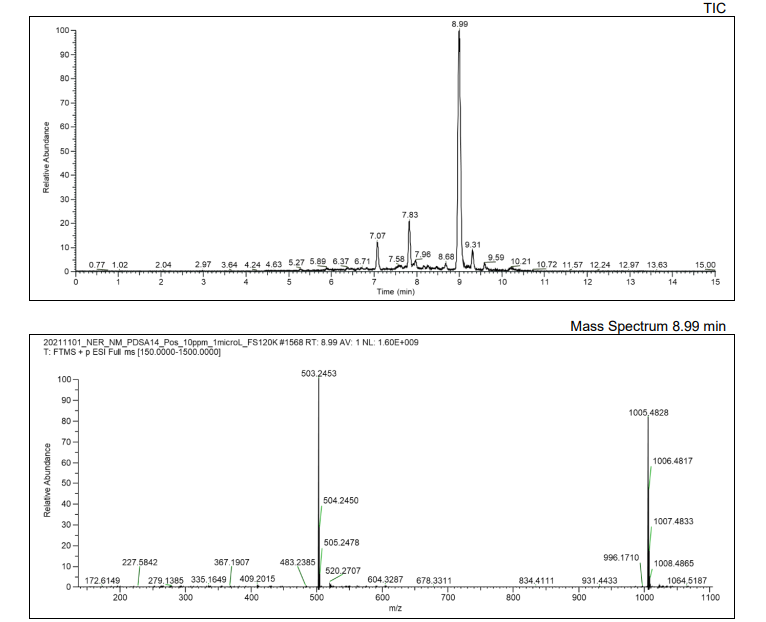


**Supplemental Figure S1.** LC-MS analysis of compound **2**


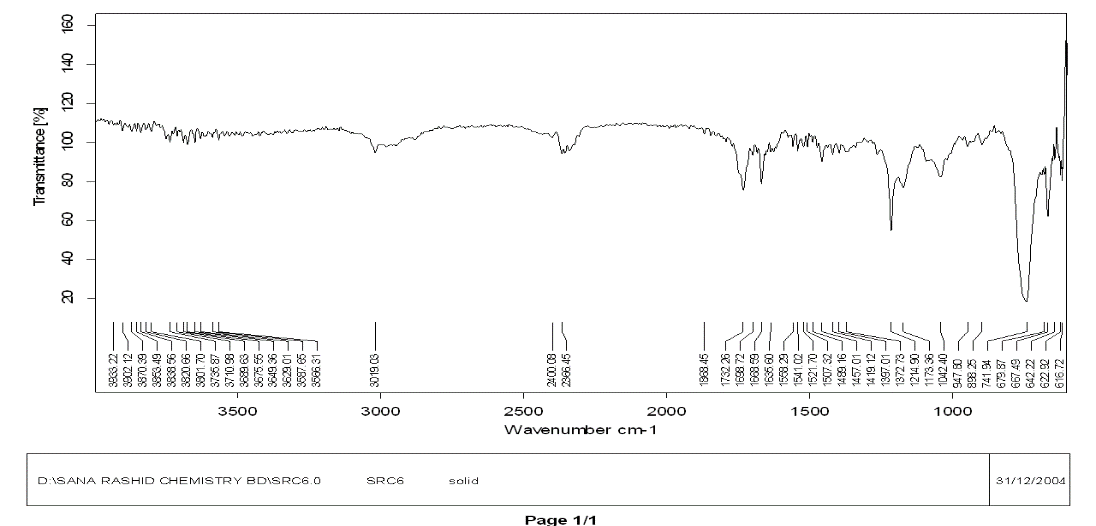


**Supplemental Figure S2.** IR spectrum of compound **2**


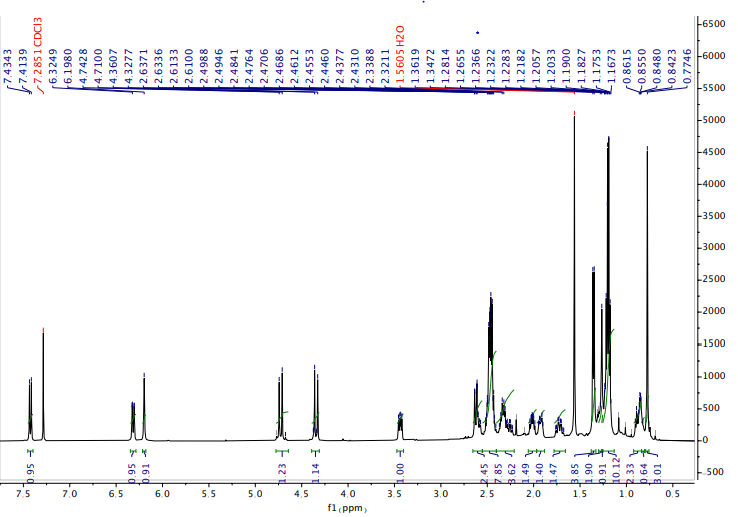


**Supplemental Figure S3.** 1H NMR spectrum of compound **2** (400 MHz, CD3OD)


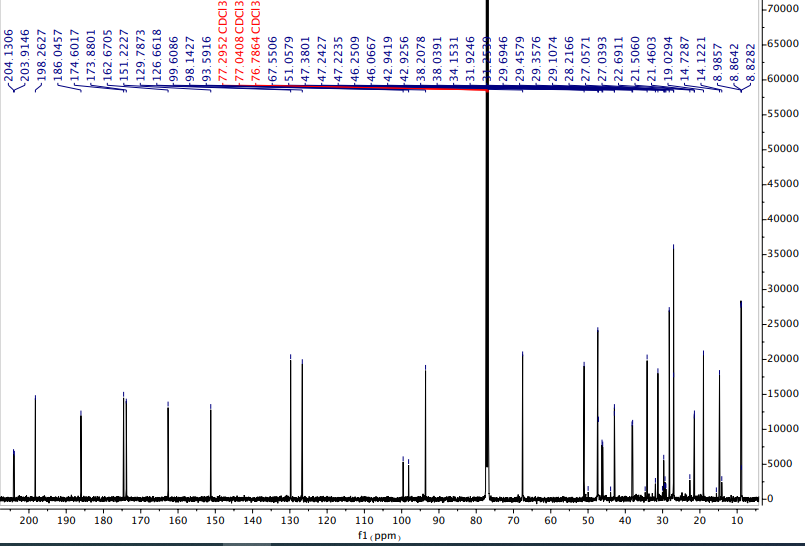


**Supplemental Figure S4.** 13C NMR of compound **2** (100 MHz, CD3OD)


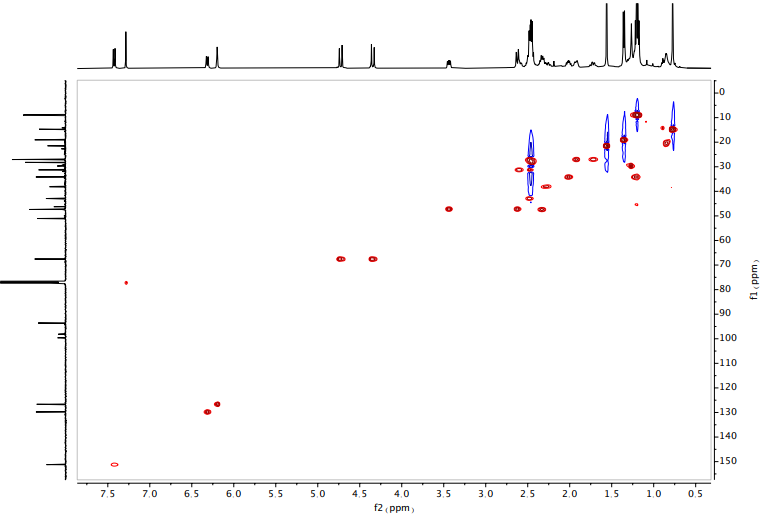


**Supplemental Figure S5.** HSQC spectrum of compound **2** (CD3OD)


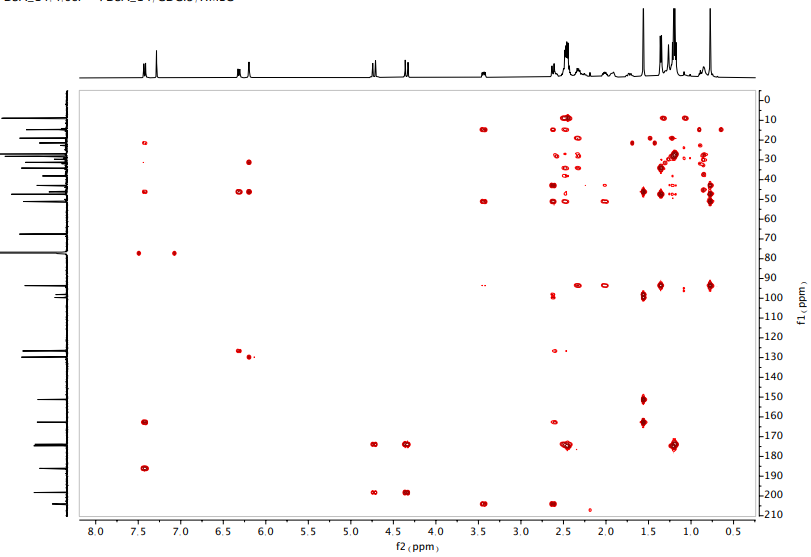


**Supplemental Figure S6.** HMBC spectrum of compound **2** (CD3OD)


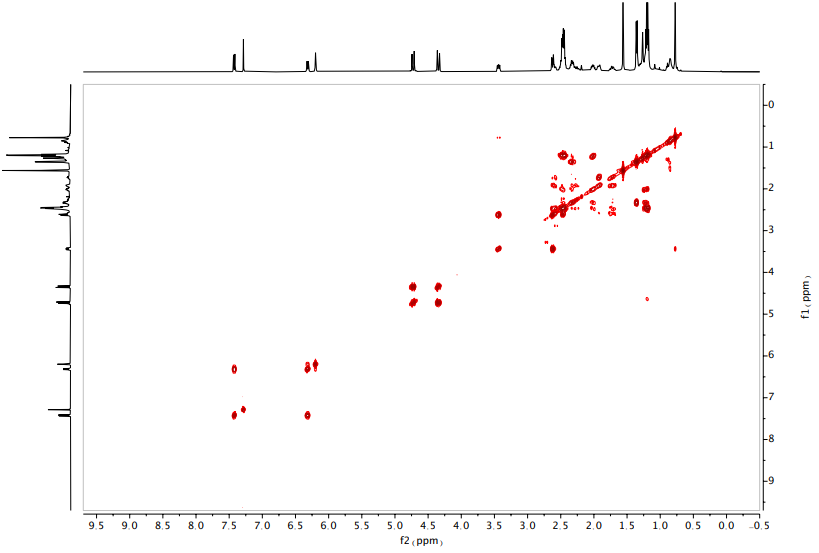


**Supplemental Figure S7.** 1H– 1H COSY spectrum of **2** (CD3OD


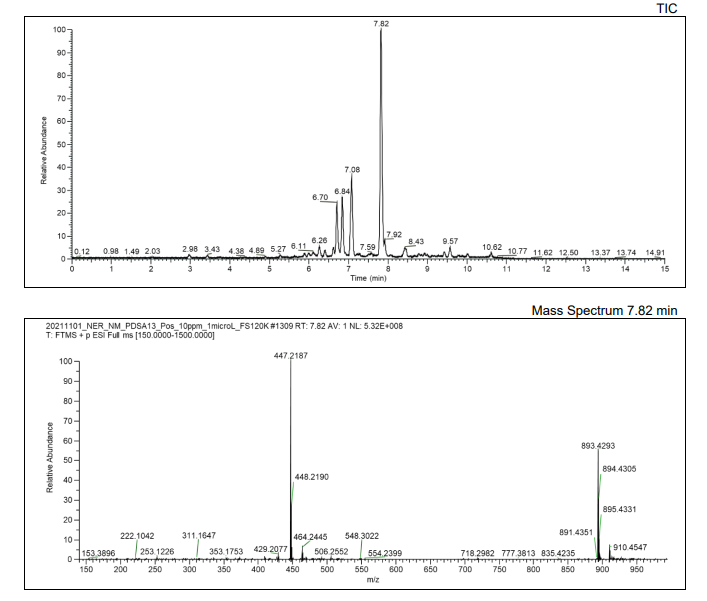


**Supplemental Figure S8.** LC-MS analysis of compound **3**


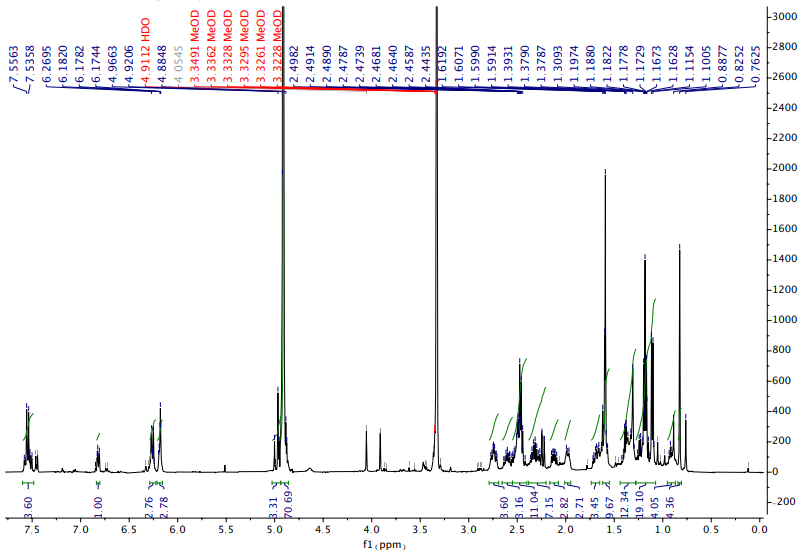


**Supplemental Figure S9.** 1H NMR spectrum of compound **3** (400 MHz, CDCl3)


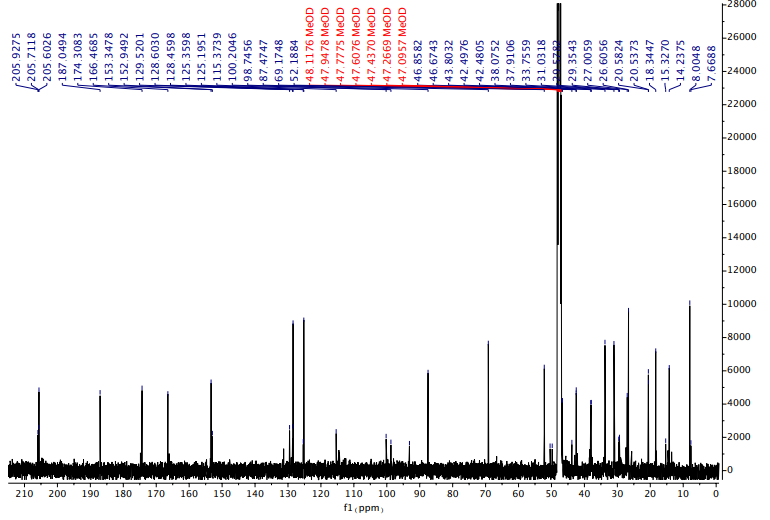


**Supplemental Figure S10.** 13C NMR of compound **3** (100 MHz, CDCl3)


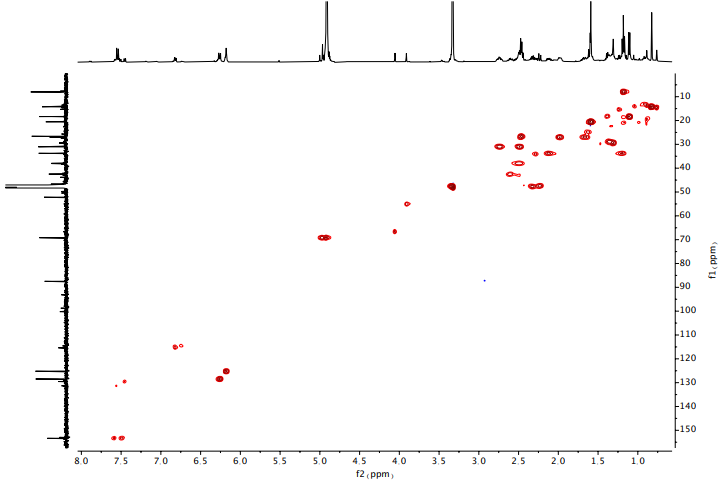


**Supplemental Figure S11.** HSQC spectrum of compound **3** (CDCl3)


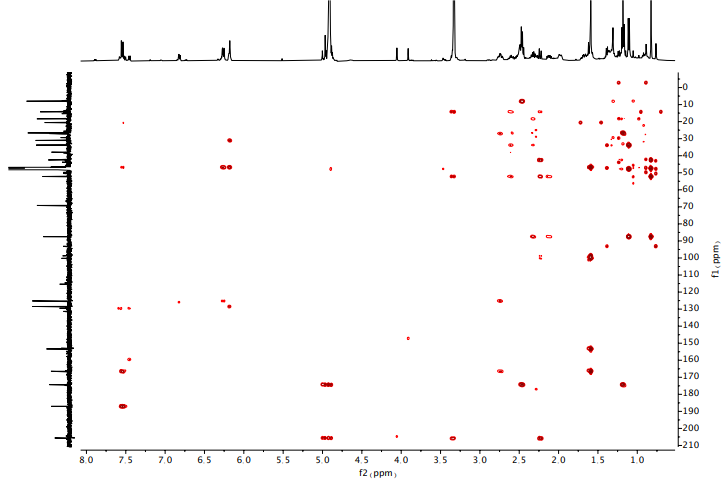


**Supplemental Figure S12.** HMBC spectrum of compound **3** (CD3OD)


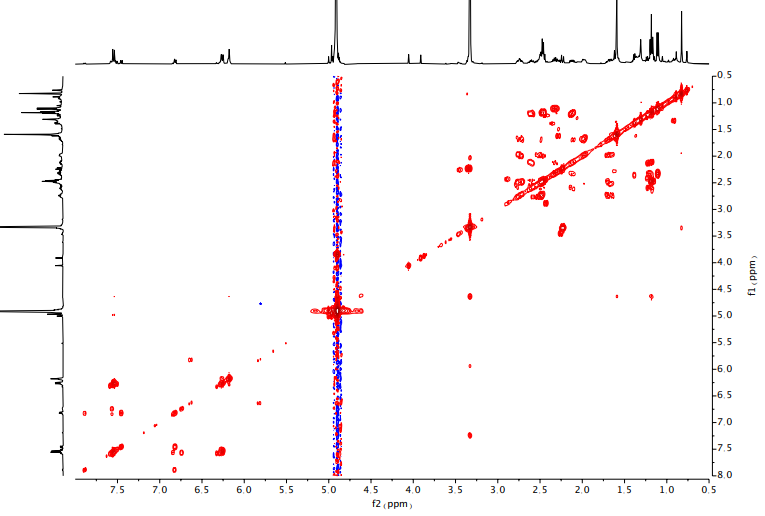


**Supplemental Figure S13.** 1H– 1H COSY spectrum of **3** (CD3OD)


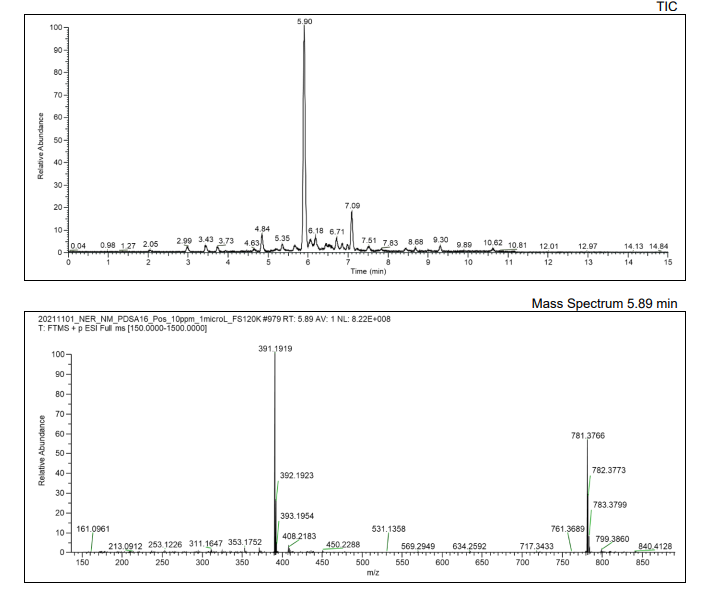


**Supplemental Figure S14.** LC-MS analysis of compound **4**


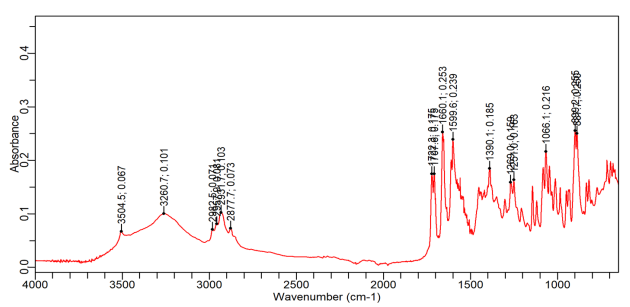


**Supplemental Figure S15.** IR spectrum of compound **4**


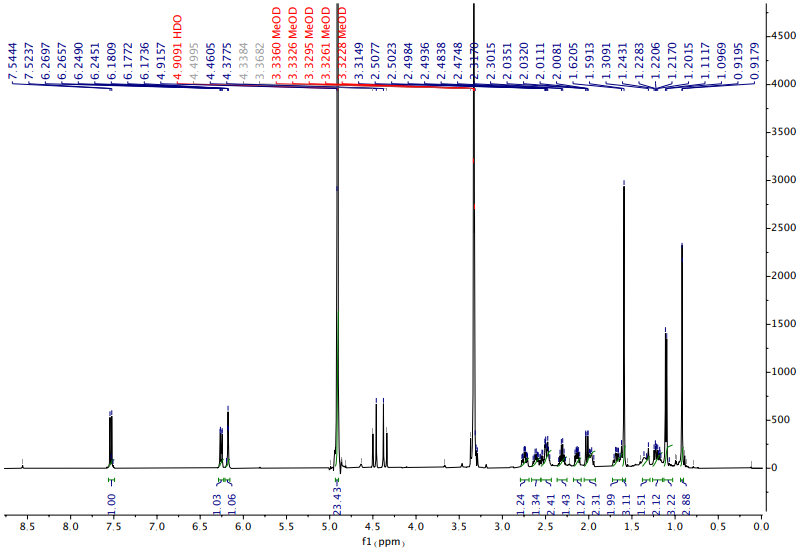


**Supplemental Figure S16.** 1H NMR spectrum of compound **4** (500 MHz, CDCl3)


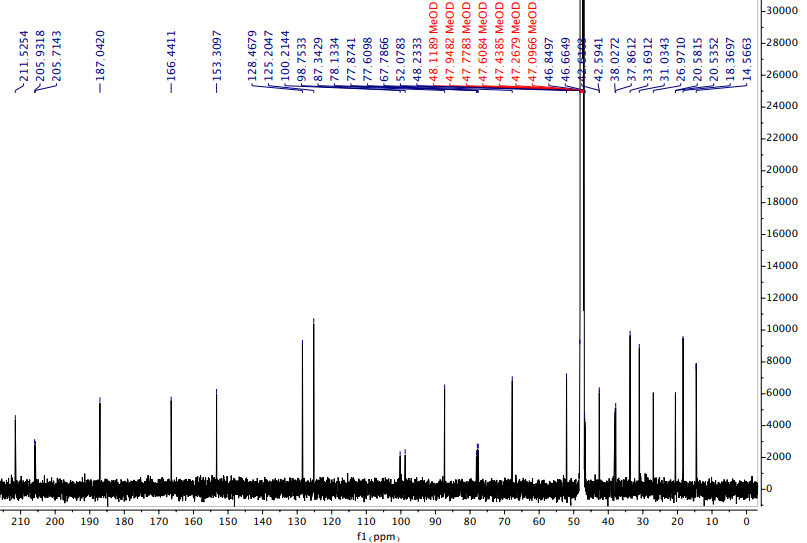


**Supplemental Figure S17.** 13C NMR of compound **4** (125 MHz, CDCl3)


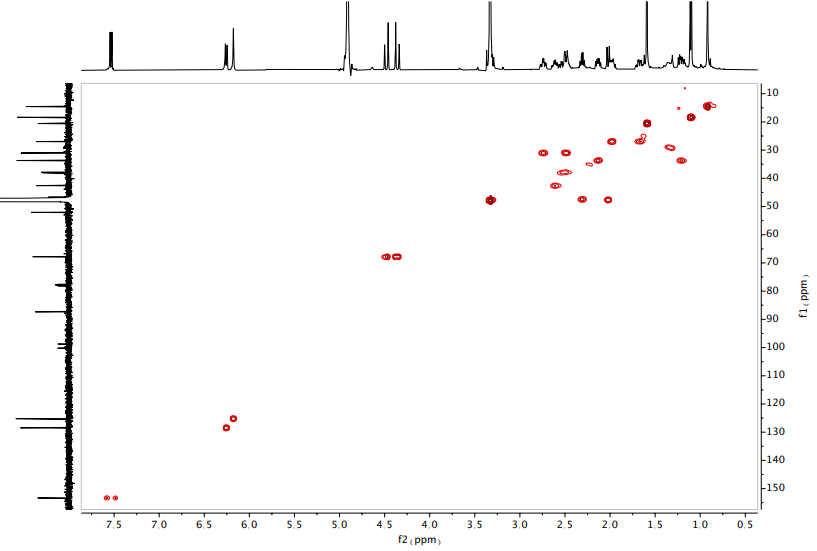


**Supplemental Figure S18.** HSQC spectrum of compound **4** (CDCl3)


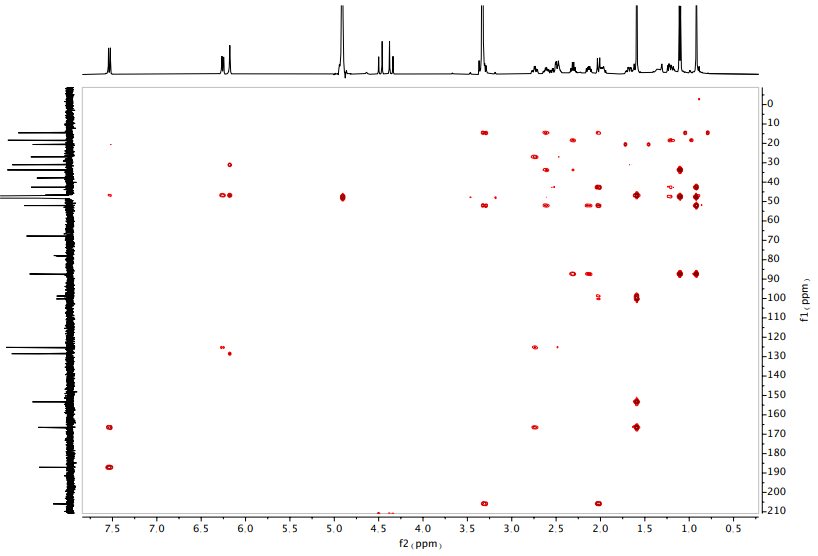


**Supplemental Figure S19.** HMBC spectrum of compound **4** (CD3OD)


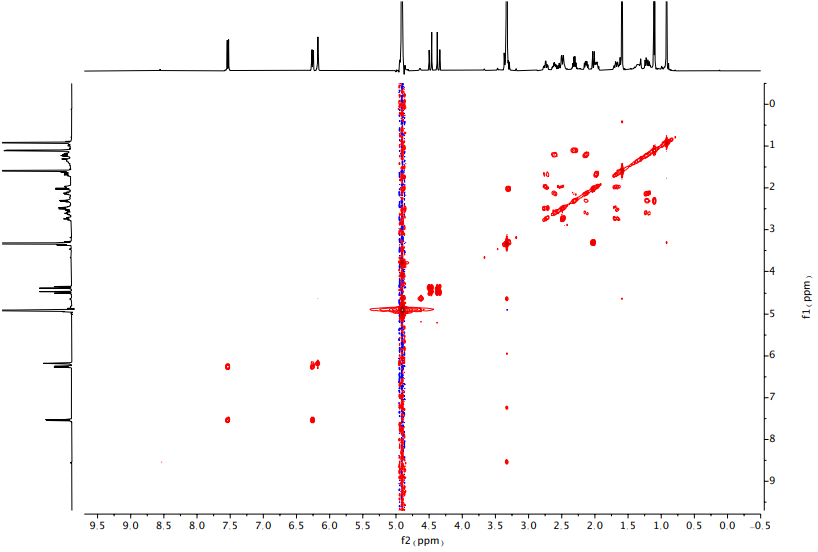


**Supplemental Figure S20.** 1H– 1H COSY spectrum of **4** (CD3OD)


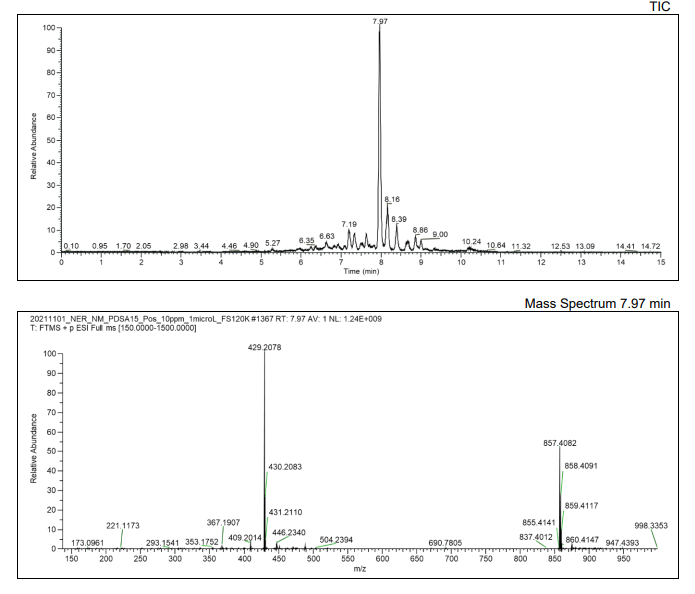


**Supplemental Figure S21.** LC-MS analysis of compound **5**


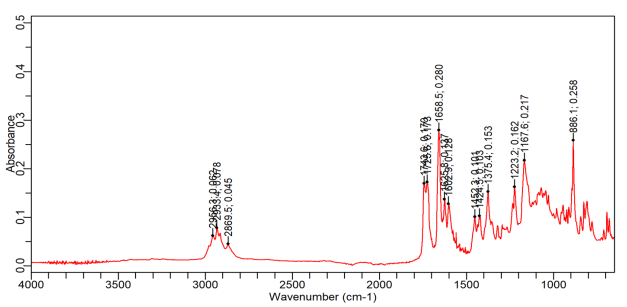


**Supplemental Figure S22.** IR spectrum of compound **5**


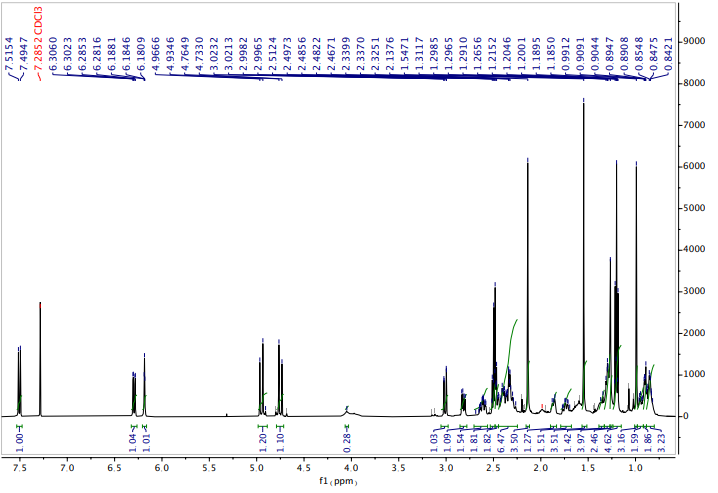


**Supplemental Figure S23.** 1H NMR spectrum of compound **5** (500 MHz, CDCl3)


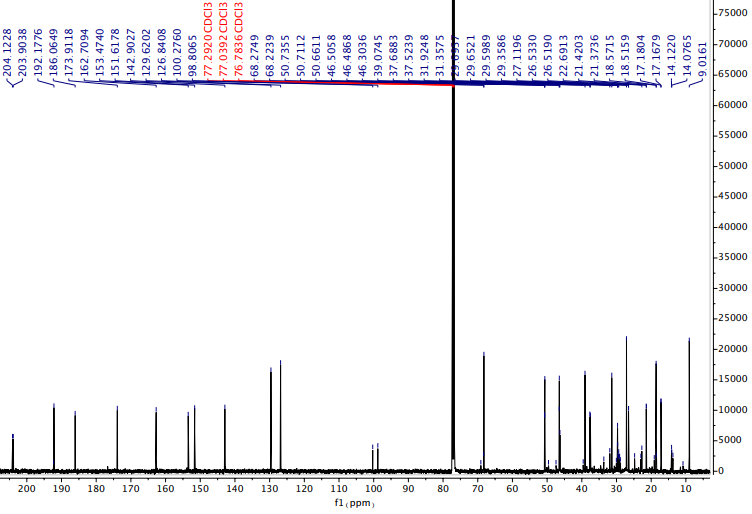


**Supplemental Figure S24.** 13C NMR of compound **5** (125 MHz, CDCl3)


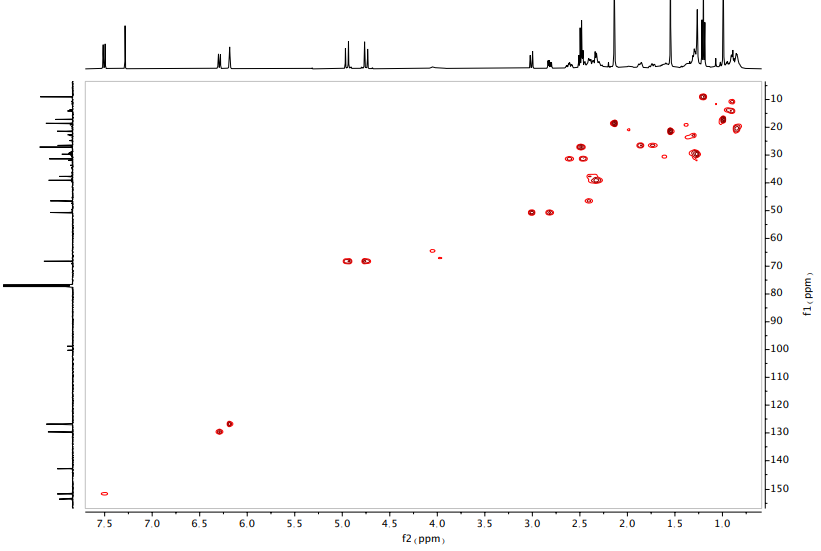


**Supplemental Figure S25.** HSQC spectrum of compound **5** (CDCl3)


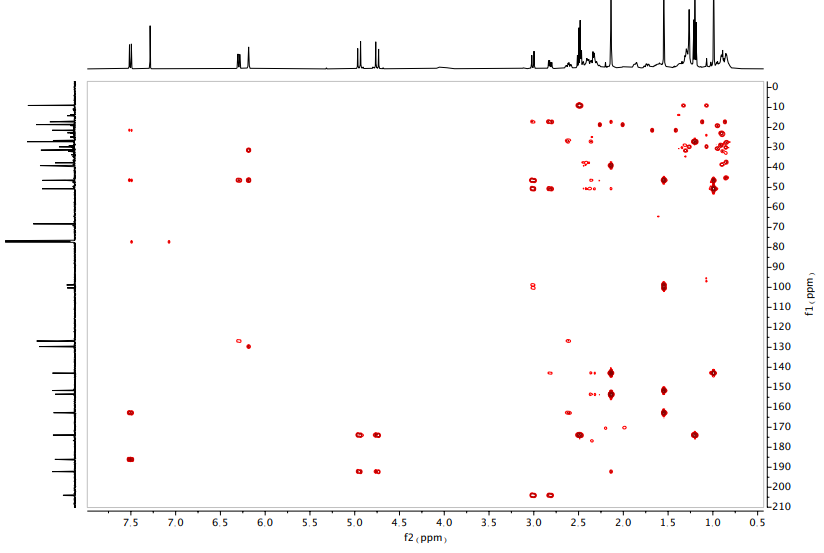


**Supplemental Figure S26.** HMBC spectrum of compound **5** (CD3OD)


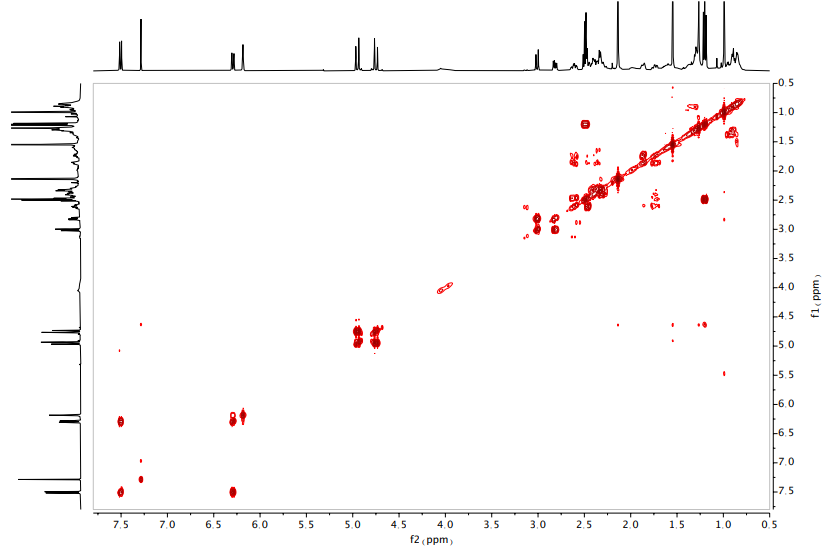


**Supplemental Figure S27.** 1H– 1H COSY spectrum of **5** (CD3OD)

**Supplemental Figure S28.** HMBC and 1H– 1H COSY correlations of compounds **2, 3, 4, 5**


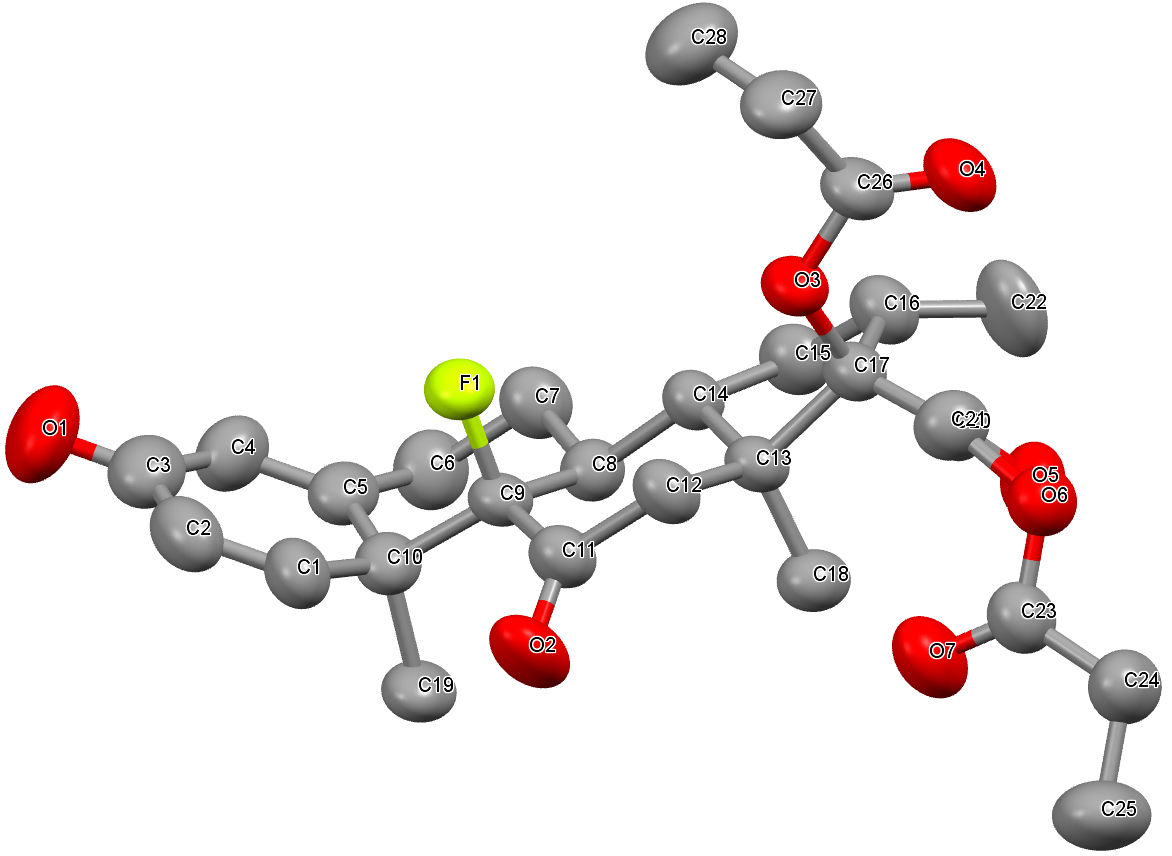


**2**


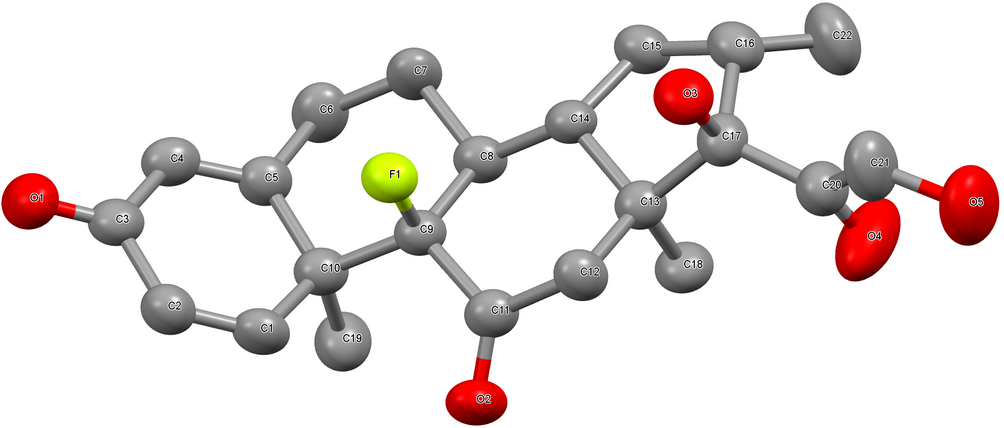


**4**


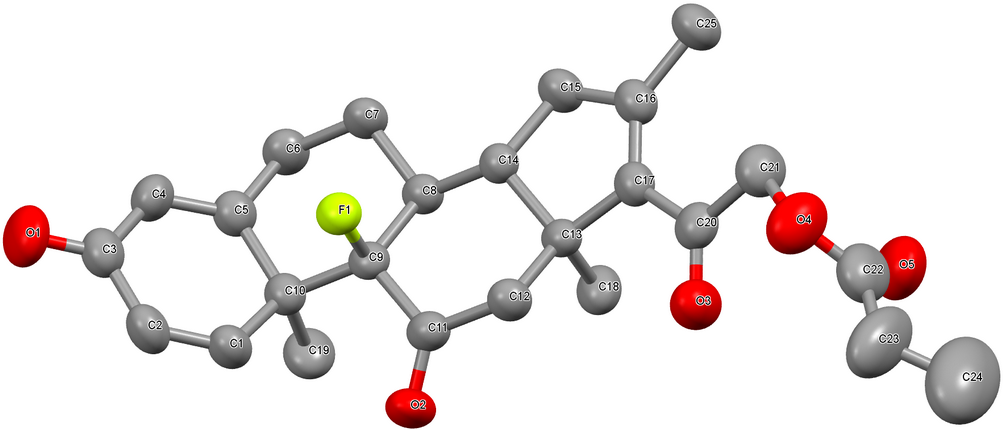


**5**

Supplemental Figure S29: Thermal Ellipsoid plotsof compounds **2, 4 and 5** with 50% probability (H-atoms have been removed for clarity)

**Supplemental Table S1. Crystal data of compound 2 by XRD**

|  | ***X*** | ***Y*** | ***Z*** | ***B*iso*/*B*eq** |
| --- | --- | --- | --- | --- |
| F1 | -0.5841 (3) | -0.5963 (4) | -0.45512 (19) |  |
| O1 | -0.5174 (6) | -0.6482 (9) | -0.7536 (4) |  |
| C3 | -0.5918 (7) | -0.6373 (12) | -0.6984 (5) |  |
| C2 | -0.6346 (8) | -0.4858 (10) | -0.6701 (5) |  |
| H2 | -0.606593 | -0.393405 | -0.693548 |  |
| O6 | -0.8131 (5) | -0.2825 (6) | -0.0644 (3) |  |
| O2 | -0.8457 (6) | -0.3570 (6) | -0.4699 (3) |  |
| C1 | -0.7130 (7) | -0.4749 (9) | -0.6115 (4) |  |
| H1 | -0.733346 | -0.374079 | -0.593791 |  |
| O3 | -0.5590 (4) | -0.5540 (5) | -0.1888 (2) |  |
| C5 | -0.7180 (6) | -0.7690 (8) | -0.6014 (4) |  |
| O4 | -0.5027 (5) | -0.6269 (7) | -0.0506 (3) |  |
| O7 | -0.9486 (5) | -0.2432 (7) | -0.1913 (3) |  |
| C4 | -0.6376 (7) | -0.7770 (10) | -0.6600 (5) |  |
| H4 | -0.610534 | -0.876045 | -0.676339 |  |
| C19 | -0.9285 (6) | -0.6091 (11) | -0.6015 (4) |  |
| H19A | -0.961807 | -0.505216 | -0.591939 |  |
| H19B | -0.968895 | -0.685458 | -0.569171 |  |
| H19C | -0.952101 | -0.634489 | -0.661220 |  |
| O5 | -0.8709 (5) | -0.5777 (6) | -0.1138 (3) |  |
| C10 | -0.7700 (5) | -0.6128 (9) | -0.5725 (4) |  |
| C9 | -0.7296 (5) | -0.6071 (8) | -0.4732 (3) |  |
| C6 | -0.7602 (8) | -0.9157 (9) | -0.5606 (5) |  |
| H6A | -0.720348 | -1.008004 | -0.582717 |  |
| H6B | -0.858559 | -0.926467 | -0.574128 |  |
| C7 | -0.7127 (7) | -0.9062 (7) | -0.4643 (4) |  |
| H7A | -0.613844 | -0.905584 | -0.450868 |  |
| H7B | -0.744153 | -0.999077 | -0.437760 |  |
| C8 | -0.7672 (6) | -0.7565 (7) | -0.4277 (4) |  |
| H8 | -0.866767 | -0.763996 | -0.437013 |  |
| C11 | -0.7738 (7) | -0.4578 (7) | -0.4290 (4) |  |
| C12 | -0.7272 (7) | -0.4446 (7) | -0.3335 (4) |  |
| H12A | -0.769220 | -0.352948 | -0.312368 |  |
| H12B | -0.629054 | -0.430628 | -0.320051 |  |
| C13 | -0.7672 (5) | -0.5960 (7) | -0.2901 (3) |  |
| C14 | -0.7134 (6) | -0.7418 (7) | -0.3319 (3) |  |
| H14 | -0.614409 | -0.728274 | -0.324719 |  |
| C15 | -0.7365 (7) | -0.8751 (7) | -0.2725 (4) |  |
| H15A | -0.683999 | -0.968272 | -0.281352 |  |
| H15B | -0.832193 | -0.903390 | -0.280878 |  |
| C16 | -0.6868 (7) | -0.8047 (8) | -0.1832 (4) |  |
| H16 | -0.589114 | -0.828271 | -0.169035 |  |
| C17 | -0.6969 (5) | -0.6196 (7) | -0.1945 (3) |  |
| C18 | -0.9229 (6) | -0.5993 (9) | -0.2991 (4) |  |
| H18A | -0.952903 | -0.502896 | -0.276489 |  |
| H18B | -0.948772 | -0.688084 | -0.268016 |  |
| H18C | -0.964252 | -0.608894 | -0.358348 |  |
| C22 | -0.7479 (10) | -0.8806 (9) | -0.1126 (5) |  |
| H22A | -0.845115 | -0.867485 | -0.124918 |  |
| H22B | -0.711098 | -0.830710 | -0.059070 |  |
| H22C | -0.726139 | -0.991537 | -0.109293 |  |
| C26 | -0.4700 (6) | -0.5720 (8) | -0.1133 (4) |  |
| C27 | -0.3307 (7) | -0.5144 (11) | -0.1201 (5) |  |
| H27A | -0.338196 | -0.408853 | -0.144680 |  |
| H27B | -0.275519 | -0.506929 | -0.063150 |  |
| C28 | -0.2607 (8) | -0.6192 (13) | -0.1730 (6) |  |
| H28A | -0.308449 | -0.616322 | -0.231286 |  |
| H28B | -0.259561 | -0.725810 | -0.151896 |  |
| H28C | -0.168818 | -0.583034 | -0.170212 |  |
| C20 | -0.7688 (7) | -0.5265 (8) | -0.1341 (4) |  |
| C21 | -0.7176 (7) | -0.3616 (8) | -0.1074 (5) |  |
| H21A | -0.629529 | -0.368569 | -0.069567 |  |
| H21B | -0.706580 | -0.301194 | -0.157470 |  |
| C23 | -0.9289 (7) | -0.2333 (8) | -0.1145 (4) |  |
| C24 | -1.0245 (7) | -0.1678 (10) | -0.0627 (4) |  |
| H24A | -0.974713 | -0.096198 | -0.020382 |  |
| H24B | -1.058336 | -0.254203 | -0.032389 |  |
| C25 | -1.1431 (8) | -0.0812 (14) | -0.1129 (6) |  |
| H25A | -1.182843 | -0.143185 | -0.161858 |  |
| H25B | -1.113183 | 0.018780 | -0.131452 |  |
| H25C | -1.209845 | -0.063400 | -0.077778 |  |

**Supplemental Table S2. Crystal data of compound 4 by XRD**

|  | ***X*** | ***y*** | ***z*** | ***U*iso*/*U*eq** |
| --- | --- | --- | --- | --- |
| F1 | 0.3827 (3) | 0.3402 (2) | 0.49936 (12) | 0.0517 (7) |
| O3 | 0.4401 (4) | 0.5035 (3) | 0.67543 (15) | 0.0579 (9) |
| H3 | 0.554 (8) | 0.479 (5) | 0.671 (3) | 0.10 (2)* |
| O2 | 0.6337 (4) | 0.5330 (3) | 0.43670 (15) | 0.0633 (10) |
| O1 | 0.2811 (5) | 0.0745 (3) | 0.33077 (18) | 0.0672 (10) |
| O5 | 0.6883 (6) | 0.7619 (5) | 0.7647 (3) | 0.0961 (16) |
| C14 | 0.2477 (5) | 0.5307 (4) | 0.5608 (2) | 0.0438 (11) |
| H14 | 0.262253 | 0.458652 | 0.582289 | 0.053* |
| C3 | 0.2988 (6) | 0.1715 (4) | 0.3492 (2) | 0.0504 (12) |
| C5 | 0.1690 (5) | 0.3437 (4) | 0.3905 (2) | 0.0477 (12) |
| C11 | 0.5360 (5) | 0.5040 (4) | 0.4786 (2) | 0.0477 (11) |
| O4 | 0.5293 (7) | 0.7915 (4) | 0.6573 (2) | 0.1126 (17) |
| C8 | 0.2126 (5) | 0.5045 (4) | 0.4917 (2) | 0.0457 (11) |
| H8 | 0.202101 | 0.575603 | 0.468978 | 0.055* |
| C10 | 0.3417 (5) | 0.4015 (4) | 0.3939 (2) | 0.0482 (12) |
| C9 | 0.3666 (5) | 0.4404 (4) | 0.4636 (2) | 0.0443 (11) |
| C13 | 0.4141 (5) | 0.5972 (4) | 0.5725 (2) | 0.0454 (11) |
| C17 | 0.4051 (6) | 0.6087 (4) | 0.6459 (2) | 0.0490 (11) |
| C1 | 0.4877 (6) | 0.3271 (4) | 0.3734 (2) | 0.0538 (13) |
| H1 | 0.599122 | 0.355682 | 0.375435 | 0.065* |
| C12 | 0.5668 (5) | 0.5303 (4) | 0.5464 (2) | 0.0519 (13) |
| H12A | 0.671963 | 0.573481 | 0.550735 | 0.062* |
| H12B | 0.580137 | 0.461498 | 0.570282 | 0.062* |
| C4 | 0.1535 (5) | 0.2393 (4) | 0.3685 (2) | 0.0524 (13) |
| H4 | 0.043604 | 0.208729 | 0.365484 | 0.063* |
| C6 | 0.0168 (6) | 0.4074 (4) | 0.4139 (2) | 0.0605 (14) |
| H6A | -0.086163 | 0.361759 | 0.410143 | 0.073* |
| H6B | 0.000792 | 0.474105 | 0.388392 | 0.073* |
| C2 | 0.4675 (6) | 0.2236 (4) | 0.3528 (2) | 0.0550 (12) |
| H2 | 0.563908 | 0.183117 | 0.340153 | 0.066* |
| C16 | 0.2072 (6) | 0.6303 (4) | 0.6595 (2) | 0.0560 (13) |
| H16 | 0.172514 | 0.577190 | 0.692442 | 0.067* |
| C18 | 0.4096 (6) | 0.7116 (4) | 0.5390 (2) | 0.0576 (13) |
| H18A | 0.392511 | 0.700714 | 0.494408 | 0.086* |
| H18B | 0.516875 | 0.749821 | 0.545898 | 0.086* |
| H18C | 0.316740 | 0.755610 | 0.555805 | 0.086* |
| C15 | 0.1137 (6) | 0.5952 (4) | 0.5984 (2) | 0.0533 (12) |
| H15A | 0.015016 | 0.548275 | 0.607938 | 0.064* |
| H15B | 0.074643 | 0.660249 | 0.575001 | 0.064* |
| C19 | 0.3381 (7) | 0.5027 (4) | 0.3479 (2) | 0.0637 (14) |
| H19A | 0.301215 | 0.478147 | 0.306750 | 0.096* |
| H19B | 0.451517 | 0.534411 | 0.344814 | 0.096* |
| H19C | 0.259348 | 0.558099 | 0.363533 | 0.096* |
| C20 | 0.5182 (7) | 0.6965 (5) | 0.6769 (3) | 0.0616 (14) |
| C7 | 0.0447 (5) | 0.4398 (5) | 0.4826 (2) | 0.0584 (13) |
| H7A | 0.047358 | 0.372780 | 0.508464 | 0.070* |
| H7B | -0.051178 | 0.485500 | 0.496818 | 0.070* |
| C21 | 0.6084 (7) | 0.6676 (5) | 0.7374 (3) | 0.0733 (16) |
| H21A | 0.525666 | 0.636666 | 0.767036 | 0.088* |
| H21B | 0.694817 | 0.610803 | 0.729010 | 0.088* |
| C00S | 0.1556 (7) | 0.7457 (5) | 0.6824 (3) | 0.0820 (18) |
| H00A | 0.193062 | 0.800781 | 0.652394 | 0.123* |
| H00B | 0.208624 | 0.760027 | 0.722713 | 0.123* |
| H00C | 0.032530 | 0.749216 | 0.686782 | 0.123* |
| H5 | 0.725 (18) | 0.805 (12) | 0.741 (6) | 0.27 (8)* |

**Supplemental Table S3. Crystal data of compound 5 by XRD**

|  | | ***X*** | | ***y*** | ***z*** | ***B*iso*/*B*eq** |
| --- | --- | --- | --- | --- | --- | --- |
| F1 | | -0.64664 (16) | | -0.5988 (3) | -0.56886 (16) |  |
| O2 | | -0.9139 (2) | | -0.5126 (6) | -0.6354 (2) |  |
| O3 | | -0.8313 (3) | | -0.3326 (5) | -0.2778 (3) |  |
| O1 | | -0.5994 (3) | | -0.7243 (6) | -0.8880 (3) |  |
| O4 | | -0.7175 (3) | | -0.1521 (5) | -0.1080 (3) |  |
| C9 | | -0.7454 (3) | | -0.7204 (6) | -0.5861 (3) |  |
| C20 | | -0.7452 (4) | | -0.4233 (7) | -0.2283 (3) |  |
| C17 | | -0.7056 (3) | | -0.6007 (7) | -0.2723 (3) |  |
| C14 | | -0.6712 (3) | | -0.7831 (6) | -0.4003 (3) |  |
| H14 | | -0.6135 (3) | | -0.6839 (6) | -0.4012 (3) |  |
| C13 | | -0.7649 (3) | | -0.6528 (6) | -0.3841 (3) |  |
| O5 | | -0.8436 (4) | | -0.3014 (8) | -0.0586 (4) |  |
| C11 | | -0.8272 (3) | | -0.5642 (6) | -0.5676 (3) |  |
| C8 | | -0.7098 (3) | | -0.8904 (6) | -0.5035 (3) |  |
| H8 | | -0.7761 (3) | | -0.9754 (6) | -0.5111 (3) |  |
| C5 | | -0.6852 (3) | | -0.9466 (6) | -0.6982 (3) |  |
| C16 | | -0.6257 (3) | | -0.7420 (7) | -0.2245 (3) |  |
| C12 | | -0.7936 (3) | | -0.4771 (6) | -0.4612 (3) |  |
| H12a | | -0.8554 (3) | | -0.3960 (6) | -0.4563 (3) |  |
| H12b | | -0.7284 (3) | | -0.3876 (6) | -0.4467 (3) |  |
| C10 | | -0.7799 (3) | | -0.8021 (6) | -0.6964 (3) |  |
| C3 | | -0.6519 (4) | | -0.7472 (8) | -0.8310 (3) |  |
| C7 | | -0.6179 (3) | | -1.0282 (7) | -0.5147 (3) |  |
| H7a | | -0.5492 (3) | | -0.9487 (7) | -0.5005 (3) |  |
| H7b | | -0.6014 (3) | | -1.1396 (7) | -0.4657 (3) |  |
| C6 | | -0.6555 (4) | | -1.1170 (7) | -0.6215 (3) |  |
| H6a | | -0.7208 (4) | | -1.2053 (7) | -0.6340 (3) |  |
| H6b | | -0.5950 (4) | | -1.1996 (7) | -0.6280 (3) |  |
| C1 | | -0.7954 (4) | | -0.6276 (7) | -0.7697 (3) |  |
| H1 | | -0.8492 (4) | | -0.5284 (7) | -0.7725 (3) |  |
| C15 | | -0.6187 (4) | | -0.8993 (7) | -0.3006 (3) |  |
| H15a | | -0.6616 (4) | | -1.0223 (7) | -0.2998 (3) |  |
| H15b | | -0.5409 (4) | | -0.9371 (7) | -0.2879 (3) |  |
| C25 | | -0.5499 (4) | | -0.7651 (8) | -0.1159 (3) |  |
| H25a | | -0.4871 (16) | | -0.672 (4) | -0.1008 (7) |  |
| H25b | | -0.5914 (9) | | -0.734 (5) | -0.0733 (3) |  |
| H25c | | -0.523 (2) | | -0.9041 (16) | -0.1037 (7) |  |
| C2 | | -0.7390 (4) | | -0.6030 (8) | -0.8307 (3) |  |
| H2 | | -0.7555 (4) | | -0.4906 (8) | -0.8745 (3) |  |
| C21 | | -0.6765 (4) | | -0.3490 (8) | -0.1219 (4) |  |
| H21a | -0.5972 (4) | | -0.3397 (8) | | -0.1126 (4) |  |
| H21b | -0.6837 (4) | | -0.4453 (8) | | -0.0723 (4) |  |
| C18 | -0.8734 (4) | | -0.7765 (8) | | -0.3986 (4) |  |
| H18a | -0.8538 (4) | | -0.900 (3) | | -0.359 (2) |  |
| H18b | -0.9233 (12) | | -0.695 (2) | | -0.377 (2) |  |
| H18c | -0.9105 (15) | | -0.812 (4) | | -0.4690 (5) |  |
| C4 | -0.6304 (4) | | -0.9168 (7) | | -0.7606 (3) |  |
| H4 | -0.5747 (4) | | -1.0112 (7) | | -0.7587 (3) |  |
| C19 | -0.8934 (4) | | -0.9238 (8) | | -0.7286 (4) |  |
| H19a | -0.8881 (11) | | -1.027 (4) | | -0.6783 (14) |  |
| H19b | -0.9541 (6) | | -0.8306 (12) | | -0.734 (3) |  |
| H19c | -0.9081 (15) | | -0.989 (4) | | -0.7930 (13) |  |
| C22 | -0.8059 (6) | | -0.1477 (12) | | -0.0822 (5) |  |
| C23 | -0.8558 (6) | | 0.0800 (12) | | -0.0961 (6) |  |
| H23a | -0.7942 (6) | | 0.1781 (12) | | -0.0704 (6) |  |
| H23b | -0.8961 (6) | | 0.1078 (12) | | -0.1679 (6) |  |
| C24 | -0.9298 (8) | | 0.1049 (16) | | -0.0440 (7) |  |
| H24a | -0.959 (6) | | 0.243 (5) | | -0.053 (6) |  |
| H24b | -0.991 (5) | | 0.009 (11) | | -0.070 (5) |  |
| H24c | -0.890 (2) | | 0.079 (15) | | 0.0271 (14) |  |
